# Supplementary material for: The π-donor/acceptor trans effect on NO release in ruthenium nitrosyl complexes: a computational insight
Source: Royal Society of Chemistry journal article supplement (doi:10.1039/d1nj00939g), 2021-01-01
Supplement: d1nj00939g1.pdf [file d1nj00939g1.pdf]

## ARTICLE

### The Role of $\pi$ -Donor/Acceptor *trans* Effect on The NO release in Ruthenium Nitrosyl Complexes: A Computational Insight

Renato Pereira Orenha,<sup>\*a</sup> Nelson Henrique Morgon,<sup>b</sup> Grazielle Cappato Guerra Silva,<sup>a</sup> Giovanni Finoto Caramori,<sup>c</sup> and Renato Luis Tame Parreira<sup>\*a</sup>

### Supplementary Material

<sup>a</sup> Núcleo de Pesquisas em Ciências Exatas e Tecnológicas, Universidade de Franca, Franca, SP, Brazil. E-mail: rpo9@hotmail.com / renato.parreira@unifran.edu.br

<sup>b</sup> Instituto de Química, Universidade Estadual de Campinas, CP 6154, 13083-970, Campinas, SP, Brazil.

<sup>c</sup> Departamento de Química, Universidade Federal de Santa Catarina, Campus Universitário Trindade, CP 476, Florianópolis, SC, 88040-900, Brazil.

**Table S1.** Optimized Cartesian coordinates, and number of imaginary frequencies (NIMAG) of the structures investigated in this study at PBE0/Def2TZV with PCM(H<sub>2</sub>O) solvation.

| <i>trans</i> -[RuCl(NO)(NH <sub>3</sub> ) <sub>4</sub> ] <sup>2+</sup> (NIMAG = 0)                    |           |           |           |  |
|-------------------------------------------------------------------------------------------------------|-----------|-----------|-----------|--|
| Atom                                                                                                  | X         | Y         | Z         |  |
| Ru                                                                                                    | 0.332343  | -0.019958 | 0.009070  |  |
| Cl                                                                                                    | 0.228936  | -2.401114 | -0.050771 |  |
| N                                                                                                     | 1.815543  | -0.276825 | 1.496112  |  |
| N                                                                                                     | -1.151663 | -0.063083 | -1.496988 |  |
| N                                                                                                     | 1.827170  | -0.197866 | -1.475959 |  |
| N                                                                                                     | -1.163880 | -0.143948 | 1.497615  |  |
| H                                                                                                     | 1.431250  | -0.204089 | 2.435660  |  |
| H                                                                                                     | 2.204313  | -1.212796 | 1.393578  |  |
| H                                                                                                     | 2.574432  | 0.398051  | 1.425419  |  |
| H                                                                                                     | -1.341699 | -1.043312 | -1.701414 |  |
| H                                                                                                     | -0.853878 | 0.390593  | -2.358100 |  |
| H                                                                                                     | -2.023711 | 0.377489  | -1.211983 |  |
| H                                                                                                     | 2.710338  | 0.223345  | -1.196323 |  |
| H                                                                                                     | 1.982115  | -1.193067 | -1.631699 |  |
| H                                                                                                     | 1.557051  | 0.222360  | -2.362667 |  |
| H                                                                                                     | -0.939861 | 0.396627  | 2.330141  |  |
| H                                                                                                     | -1.249830 | -1.124780 | 1.759971  |  |
| H                                                                                                     | -2.072649 | 0.174299  | 1.167968  |  |
| N                                                                                                     | 0.399312  | 1.717856  | 0.057097  |  |
| O                                                                                                     | 0.437680  | 2.884711  | 0.092576  |  |
| <i>trans</i> -[RuCl(NO)(NH <sub>3</sub> ) <sub>4</sub> ] <sup>+</sup> (NIMAG = 0)                     |           |           |           |  |
| Atom                                                                                                  | X         | Y         | Z         |  |
| Ru                                                                                                    | 0.375767  | -0.052637 | 0.031838  |  |
| Cl                                                                                                    | 0.264911  | -2.549919 | -0.105304 |  |
| N                                                                                                     | 1.880018  | -0.277171 | 1.524375  |  |
| N                                                                                                     | -1.131580 | 0.039112  | -1.454380 |  |
| N                                                                                                     | 1.875509  | -0.191272 | -1.468917 |  |
| N                                                                                                     | -1.145020 | -0.217723 | 1.501974  |  |
| H                                                                                                     | 1.536037  | -0.067113 | 2.457850  |  |
| H                                                                                                     | 2.187620  | -1.247547 | 1.510246  |  |
| H                                                                                                     | 2.679461  | 0.327023  | 1.351990  |  |
| H                                                                                                     | -1.784994 | -0.728076 | -1.313246 |  |
| H                                                                                                     | -0.749170 | -0.057103 | -2.392086 |  |
| H                                                                                                     | -1.642815 | 0.919468  | -1.418399 |  |
| H                                                                                                     | 2.798825  | 0.046696  | -1.116330 |  |
| H                                                                                                     | 1.888982  | -1.162499 | -1.774988 |  |
| H                                                                                                     | 1.690151  | 0.405753  | -2.270786 |  |
| H                                                                                                     | -0.880666 | 0.195369  | 2.392491  |  |
| H                                                                                                     | -1.305579 | -1.214285 | 1.638349  |  |
| H                                                                                                     | -2.018649 | 0.214247  | 1.211369  |  |
| N                                                                                                     | 0.411322  | 1.763341  | 0.109575  |  |
| O                                                                                                     | -0.226818 | 2.758828  | -0.236321 |  |
| <i>trans</i> -[RuCl(NO)(NH <sub>3</sub> ) <sub>4</sub> ] <sup>+</sup> + 9H <sub>2</sub> O (NIMAG = 0) |           |           |           |  |
| Atom                                                                                                  | X         | Y         | Z         |  |
| Ru                                                                                                    | -0.953660 | -0.285526 | 0.193387  |  |
| N                                                                                                     | -0.832449 | -2.329586 | 0.754690  |  |
| H                                                                                                     | 0.156633  | -2.598820 | 0.918478  |  |
| H                                                                                                     | -1.375160 | -2.531859 | 1.589350  |  |
| H                                                                                                     | -1.211385 | -2.885857 | -0.019547 |  |
| Cl                                                                                                    | -3.391796 | -0.777354 | -0.416574 |  |
| N                                                                                                     | -1.594863 | 0.304371  | 2.128268  |  |
| H                                                                                                     | -0.836456 | 0.777410  | 2.616664  |  |
| H                                                                                                     | -2.389758 | 0.950158  | 2.025261  |  |
| H                                                                                                     | -1.889827 | -0.485104 | 2.696450  |  |
| N                                                                                                     | -1.378133 | 1.683703  | -0.471336 |  |
| H                                                                                                     | -0.546514 | 2.288313  | -0.373607 |  |
| H                                                                                                     | -1.663773 | 1.672381  | -1.446538 |  |
| H                                                                                                     | -2.157427 | 2.053412  | 0.082057  |  |

|   |           |           |           |
|---|-----------|-----------|-----------|
| N | -0.385565 | -0.887112 | -1.766943 |
| H | 0.641782  | -0.947321 | -1.817202 |
| H | -0.808976 | -1.799302 | -1.966854 |
| H | -0.697336 | -0.226459 | -2.473429 |
| O | 1.854436  | 1.806433  | -2.437849 |
| H | 1.597259  | 2.280446  | -1.609703 |
| H | 2.126235  | 0.875622  | -2.247401 |
| N | 0.728276  | 0.088785  | 0.668734  |
| O | 1.406964  | 0.696735  | 1.530893  |
| O | 6.057533  | -1.300982 | 0.822150  |
| H | 6.470391  | -1.855487 | 1.500113  |
| H | 6.723695  | -0.901013 | 0.244374  |
| O | 2.524798  | -0.803203 | -1.885460 |
| H | 2.954965  | -0.907205 | -0.983178 |
| H | 2.996141  | -1.315030 | -2.560265 |
| O | 3.524969  | -0.991925 | 0.551215  |
| H | 4.522062  | -1.099105 | 0.667996  |
| H | 3.169261  | -0.241399 | 1.064165  |
| O | 1.858920  | -3.002412 | 1.090506  |
| H | 2.552020  | -2.307955 | 0.908143  |
| H | 2.209407  | -3.719092 | 1.639305  |
| O | 1.078818  | 3.107260  | -0.136308 |
| H | 1.487128  | 2.720703  | 0.656951  |
| H | 1.145946  | 4.109077  | -0.140044 |
| O | -3.769386 | 1.887411  | 1.189864  |
| H | -4.417290 | 2.531022  | 1.514101  |
| H | -4.194013 | 1.167301  | 0.681414  |
| O | 1.242931  | 5.694774  | -0.192964 |
| H | 0.562259  | 6.301700  | 0.133093  |
| H | 1.960881  | 6.179527  | -0.626146 |
| O | -2.047267 | -3.277458 | -1.722196 |
| H | -2.223347 | -4.097844 | -2.207233 |
| H | -2.865839 | -2.764249 | -1.566724 |

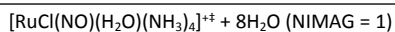

| Atom | X         | Y         | Z         |
|------|-----------|-----------|-----------|
| Ru   | -0.776099 | -0.498285 | 0.026080  |
| N    | 0.589844  | -1.687946 | 1.157895  |
| H    | 1.515339  | -1.247355 | 1.275186  |
| H    | 0.204920  | -1.849493 | 2.084224  |
| H    | 0.716817  | -2.589045 | 0.690133  |
| Cl   | -2.020255 | -2.613509 | -0.274084 |
| N    | -2.244129 | -0.208150 | 1.552478  |
| H    | -2.138889 | 0.719150  | 1.966367  |
| H    | -3.180470 | -0.327304 | 1.153220  |
| H    | -2.116590 | -0.900625 | 2.285714  |
| N    | -2.261070 | 0.493536  | -1.146342 |
| H    | -2.250693 | 1.477724  | -0.863546 |
| H    | -2.010433 | 0.444672  | -2.128338 |
| H    | -3.189739 | 0.091330  | -0.993875 |
| N    | 0.483477  | -1.138582 | -1.567779 |
| H    | 1.360134  | -0.612322 | -1.527092 |
| H    | 0.671417  | -2.143260 | -1.489537 |
| H    | 0.039632  | -0.939851 | -2.459085 |
| O    | 0.159624  | 1.400701  | -1.075637 |
| H    | -0.279854 | 2.240258  | -0.762843 |
| H    | 1.154049  | 1.410461  | -1.101788 |
| N    | 0.188084  | 0.883430  | 1.521031  |
| O    | -0.494342 | 1.810539  | 2.091668  |
| O    | 6.920940  | 0.443681  | -0.416054 |
| H    | 7.498683  | -0.175328 | 0.053358  |
| H    | 7.327357  | 0.747789  | -1.240492 |
| O    | 2.711743  | 0.952854  | -1.443699 |

|   |           |           |           |
|---|-----------|-----------|-----------|
| H | 3.445322  | 1.020225  | -0.761722 |
| H | 3.041848  | 1.170233  | -2.328551 |
| O | 4.590361  | 1.092968  | 0.387800  |
| H | 5.525223  | 0.853643  | 0.072918  |
| H | 4.593359  | 1.919508  | 0.894340  |
| O | 3.325691  | -0.952570 | 1.563769  |
| H | 3.835052  | -0.188220 | 1.181715  |
| H | 3.771582  | -1.310126 | 2.346188  |
| O | -1.416296 | 3.186985  | -0.066124 |
| H | -1.231656 | 2.986991  | 0.877569  |
| H | -1.704406 | 4.127926  | -0.230077 |
| O | -4.599892 | -0.867976 | -0.061641 |
| H | -5.567428 | -0.813460 | -0.040849 |
| H | -4.292622 | -1.782807 | -0.209539 |
| O | -2.176015 | 5.645012  | -0.527427 |
| H | -3.098684 | 5.938887  | -0.552590 |
| H | -1.574322 | 6.382482  | -0.707728 |
| O | 0.740028  | -3.940313 | -0.806390 |
| H | 1.256112  | -4.738180 | -0.998186 |
| H | -0.216548 | -4.130750 | -0.764292 |

*trans*-[RuCl(H<sub>2</sub>O)(NH<sub>3</sub>)<sub>4</sub>]<sup>+</sup> + NO + 8H<sub>2</sub>O (NIMAG = 0)

| Atom | X         | Y         | Z         |
|------|-----------|-----------|-----------|
| Ru   | -0.878336 | -0.516514 | -0.320764 |
| N    | 0.111065  | -0.459610 | 1.525947  |
| H    | 1.066402  | -0.065754 | 1.422965  |
| H    | -0.390572 | 0.120821  | 2.205232  |
| H    | 0.203942  | -1.420159 | 1.871294  |
| Cl   | -2.426942 | -2.214420 | 0.528391  |
| N    | -2.203363 | 1.026941  | 0.278147  |
| H    | -1.912045 | 1.907944  | -0.144776 |
| H    | -3.150950 | 0.789566  | -0.028411 |
| H    | -2.179230 | 1.162291  | 1.292438  |
| N    | -1.900366 | -0.564592 | -2.180881 |
| H    | -1.554239 | 0.213532  | -2.737413 |
| H    | -1.758469 | -1.424531 | -2.702473 |
| H    | -2.905644 | -0.440537 | -1.998560 |
| N    | 0.471773  | -2.042305 | -0.924177 |
| H    | 1.323812  | -1.617073 | -1.301215 |
| H    | 0.687381  | -2.615493 | -0.101334 |
| H    | 0.069026  | -2.648217 | -1.633499 |
| O    | 0.340237  | 0.875273  | -1.058425 |
| H    | 0.279349  | 1.848949  | -0.658770 |
| H    | 1.219868  | 0.579334  | -1.463809 |
| N    | -1.147801 | 1.921574  | 3.020494  |
| O    | -0.365456 | 2.874025  | 2.582811  |
| O    | 5.909227  | -1.929627 | -0.038851 |
| H    | 6.150221  | -2.254922 | 0.840560  |
| H    | 6.183392  | -2.548670 | -0.730809 |
| O    | 2.497832  | -0.109256 | -1.994015 |
| H    | 3.342846  | -0.000526 | -1.451251 |
| H    | 2.678467  | -0.142247 | -2.944624 |
| O    | 4.552996  | 0.182280  | -0.446094 |
| H    | 5.113812  | -0.651284 | -0.288954 |
| H    | 5.113368  | 0.953964  | -0.620513 |
| O    | 2.747421  | 0.539647  | 1.522263  |
| H    | 3.454279  | 0.445281  | 0.830336  |
| H    | 3.001061  | 1.188682  | 2.195135  |
| O    | 0.034307  | 3.073936  | -0.014354 |
| H    | -0.075842 | 3.071340  | 0.980245  |
| H    | 0.173021  | 3.977006  | -0.414966 |
| O    | -4.488087 | -0.318721 | -0.977929 |
| H    | -5.400532 | -0.117277 | -1.236377 |

|   |           |           |           |
|---|-----------|-----------|-----------|
| H | -4.443712 | -1.120653 | -0.423658 |
| O | 0.393576  | 5.416826  | -1.089385 |
| H | -0.321985 | 5.995006  | -1.392441 |
| H | 1.252406  | 5.856481  | -1.174643 |
| O | 0.292034  | -3.382647 | 1.657707  |
| H | 0.719135  | -4.070468 | 2.191074  |
| H | -0.665640 | -3.548598 | 1.563678  |

*trans*-[RuCl(HNO)(NH<sub>3</sub>)<sub>4</sub>]<sup>2+</sup> (NIMAG = 0)

| Atom | X         | Y         | Z        |
|------|-----------|-----------|----------|
| Ru   | -2.439508 | -0.505319 | 4.091912 |
| N    | -3.213058 | -1.993792 | 2.802377 |
| N    | -1.683864 | 0.558680  | 2.675006 |
| N    | -4.216757 | 0.603687  | 3.838869 |
| N    | -1.723123 | 0.950353  | 5.441903 |
| N    | -0.674758 | -1.634605 | 4.391702 |
| Cl   | -3.446207 | -1.621116 | 5.924122 |
| H    | -2.386396 | 1.064194  | 6.206541 |
| H    | -0.829253 | 0.696165  | 5.856986 |
| H    | -1.612973 | 1.853012  | 4.978903 |
| H    | -0.797987 | -2.148367 | 5.263753 |
| H    | -0.503497 | -2.319753 | 3.657397 |
| H    | 0.165961  | -1.065825 | 4.473653 |
| H    | -3.883268 | -2.538286 | 3.344392 |
| H    | -3.690374 | -1.620771 | 1.984353 |
| H    | -2.500125 | -2.638029 | 2.464365 |
| H    | -4.707541 | 0.679216  | 4.728434 |
| H    | -4.008890 | 1.545518  | 3.505921 |
| H    | -4.857645 | 0.171946  | 3.176798 |
| O    | -1.790510 | 1.806756  | 2.548067 |
| H    | -1.119669 | 0.119802  | 1.925196 |

*trans*-[RuCl(HNO)(NH<sub>3</sub>)<sub>4</sub>]<sup>2+</sup> + 9H<sub>2</sub>O (NIMAG = 0)

| Atom | X         | Y         | Z         |
|------|-----------|-----------|-----------|
| Ru   | -0.917941 | -0.660372 | 0.131042  |
| N    | 0.527189  | -2.206043 | 0.166456  |
| H    | 1.315484  | -1.972929 | 0.783972  |
| H    | 0.120872  | -3.091034 | 0.461499  |
| H    | 0.859660  | -2.326154 | -0.804336 |
| Cl   | -2.050326 | -1.774454 | -1.784318 |
| N    | -2.215491 | -1.748494 | 1.384218  |
| H    | -1.732800 | -2.333493 | 2.062194  |
| H    | -2.810710 | -1.078266 | 1.905535  |
| H    | -2.801604 | -2.337230 | 0.796098  |
| N    | -2.356630 | 0.849173  | 0.026849  |
| H    | -1.959609 | 1.794436  | -0.130075 |
| H    | -2.996599 | 0.633099  | -0.735039 |
| H    | -2.886516 | 0.862186  | 0.912486  |
| N    | 0.300322  | 0.301470  | -1.279247 |
| H    | 1.106719  | 0.816165  | -0.887621 |
| H    | 0.659336  | -0.443808 | -1.896573 |
| H    | -0.238045 | 0.948041  | -1.868032 |
| O    | 1.039896  | 3.686821  | 0.600495  |
| H    | 0.161532  | 3.612187  | 0.156681  |
| H    | 1.657136  | 3.001860  | 0.247439  |
| N    | -0.068123 | 0.126195  | 1.643217  |
| O    | -0.592585 | 0.911188  | 2.480236  |
| H    | 0.934419  | -0.171792 | 1.889014  |
| O    | 5.956641  | -1.000590 | -0.217185 |
| H    | 6.219307  | -1.894511 | 0.045321  |
| H    | 6.414302  | -0.719867 | -1.022730 |
| O    | 2.652591  | 1.744278  | -0.491754 |
| H    | 3.313878  | 1.272263  | 0.095697  |
| H    | 3.085352  | 2.064476  | -1.298907 |

## ARTICLE

## Journal Name

|   |           |           |           |
|---|-----------|-----------|-----------|
| O | 4.324346  | 0.432319  | 1.087203  |
| H | 4.998834  | -0.132629 | 0.570754  |
| H | 4.770311  | 1.006523  | 1.729213  |
| O | 2.335191  | -0.921430 | 2.057310  |
| H | 3.149732  | -0.427160 | 1.719090  |
| H | 2.518455  | -1.380363 | 2.891193  |
| O | -1.366935 | 3.405286  | -0.722561 |
| H | -1.985087 | 4.144869  | -0.617477 |
| H | -1.212694 | 3.188769  | -1.686640 |
| O | -3.597519 | 0.402024  | 2.572302  |
| H | -3.104432 | 0.855726  | 3.275380  |
| H | -4.550791 | 0.428536  | 2.751074  |
| O | -0.875906 | 2.419176  | -3.094229 |
| H | -1.621380 | 2.155004  | -3.657277 |
| H | -0.143223 | 2.744869  | -3.641534 |
| O | 0.983199  | -2.134806 | -2.630522 |
| H | 1.706446  | -2.408731 | -3.215024 |
| H | 0.114416  | -2.399194 | -2.984636 |

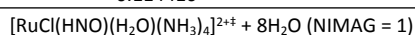

| Atom | X         | Y         | Z         |
|------|-----------|-----------|-----------|
| Ru   | -0.695360 | -0.572588 | 0.101020  |
| N    | 0.830979  | -1.819705 | 0.943708  |
| H    | 1.641504  | -1.261624 | 1.234661  |
| H    | 0.483412  | -2.326473 | 1.753287  |
| H    | 1.122667  | -2.500402 | 0.232759  |
| Cl   | -1.659767 | -2.608623 | -0.797174 |
| N    | -2.176803 | -0.796115 | 1.626860  |
| H    | -2.197002 | 0.025238  | 2.229419  |
| H    | -3.093303 | -0.932783 | 1.184643  |
| H    | -1.971931 | -1.608852 | 2.201589  |
| N    | -2.249827 | 0.513174  | -0.867526 |
| H    | -2.303290 | 1.465627  | -0.492565 |
| H    | -2.074164 | 0.582166  | -1.866327 |
| H    | -3.144204 | 0.030149  | -0.726806 |
| N    | 0.595291  | -0.607973 | -1.596122 |
| H    | 1.335604  | 0.097629  | -1.532199 |
| H    | 1.008141  | -1.543929 | -1.680733 |
| H    | 0.060783  | -0.423411 | -2.441338 |
| O    | 0.159306  | 1.578882  | 0.049699  |
| H    | -0.513951 | 2.331105  | 0.088828  |
| H    | 1.019077  | 1.769979  | -0.441876 |
| N    | 0.111305  | 0.561620  | 1.996610  |
| O    | -0.527211 | 1.191810  | 2.862822  |
| H    | 1.158268  | 0.727101  | 2.008211  |
| O    | 6.074778  | -0.355156 | -0.776275 |
| H    | 6.495569  | -1.074945 | -0.284419 |
| H    | 6.333575  | -0.366073 | -1.708992 |
| O    | 2.365661  | 1.753046  | -1.240790 |
| H    | 3.222622  | 1.635980  | -0.724247 |
| H    | 2.484750  | 2.308696  | -2.024516 |
| O    | 4.460514  | 1.317543  | 0.235365  |
| H    | 5.127141  | 0.658843  | -0.165807 |
| H    | 4.910358  | 2.106910  | 0.574449  |
| O    | 2.801958  | 0.196499  | 1.961673  |
| H    | 3.467845  | 0.617306  | 1.341758  |
| H    | 3.215382  | -0.029784 | 2.809168  |
| O    | -1.765822 | 3.265242  | 0.144743  |
| H    | -2.091906 | 3.544717  | 1.012886  |
| H    | -1.918194 | 3.977640  | -0.554656 |
| O    | -4.447873 | -1.220697 | -0.107676 |
| H    | -5.412343 | -1.145900 | -0.042640 |
| H    | -4.184088 | -2.059044 | -0.526999 |

|   |           |           |           |
|---|-----------|-----------|-----------|
| O | -2.134618 | 5.045219  | -1.663347 |
| H | -2.925845 | 5.106755  | -2.218067 |
| H | -1.499458 | 5.742650  | -1.881735 |
| O | 1.353716  | -3.407107 | -1.424117 |
| H | 2.071921  | -3.976223 | -1.740821 |
| H | 0.483048  | -3.817864 | -1.571325 |

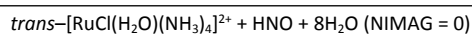

| Atom | X         | Y         | Z         |
|------|-----------|-----------|-----------|
| Ru   | -0.861827 | -0.555552 | -0.070128 |
| N    | 0.679026  | -1.559598 | 0.975010  |
| H    | 1.440720  | -0.922404 | 1.254367  |
| H    | 0.307732  | -1.987180 | 1.820319  |
| H    | 1.037961  | -2.317413 | 0.387235  |
| Cl   | -2.177132 | -2.595356 | 0.005239  |
| N    | -1.753887 | 0.072932  | 1.742112  |
| H    | -1.229052 | 0.874558  | 2.110282  |
| H    | -2.738603 | 0.300270  | 1.587522  |
| H    | -1.722344 | -0.670230 | 2.436322  |
| N    | -2.433061 | 0.452605  | -1.077204 |
| H    | -2.251196 | 1.460577  | -1.046513 |
| H    | -2.532735 | 0.166062  | -2.046891 |
| H    | -3.310174 | 0.252114  | -0.578185 |
| N    | 0.105163  | -1.180438 | -1.852102 |
| H    | 0.943427  | -0.608092 | -1.985623 |
| H    | 0.382188  | -2.164270 | -1.735860 |
| H    | -0.480301 | -1.098234 | -2.678588 |
| O    | 0.198211  | 1.151306  | -0.167717 |
| H    | -0.335675 | 2.022323  | -0.243108 |
| H    | 1.069547  | 1.142909  | -0.704295 |
| N    | 0.536099  | 1.935725  | 2.542028  |
| O    | 0.859098  | 3.119803  | 2.769658  |
| H    | 1.391477  | 1.357514  | 2.283410  |
| O    | 5.698247  | -1.515654 | -0.576955 |
| H    | 6.013774  | -2.125252 | 0.105639  |
| H    | 5.904696  | -1.841820 | -1.464710 |
| O    | 2.288064  | 0.934956  | -1.561099 |
| H    | 3.155851  | 0.811709  | -1.059580 |
| H    | 2.406346  | 1.464427  | -2.363316 |
| O    | 4.402604  | 0.608976  | -0.094609 |
| H    | 4.943739  | -0.232693 | -0.291021 |
| H    | 4.978075  | 1.386934  | -0.029276 |
| O    | 2.756400  | 0.234177  | 1.949939  |
| H    | 3.425615  | 0.408849  | 1.225230  |
| H    | 3.195228  | -0.103065 | 2.746693  |
| O    | -1.286581 | 3.161896  | -0.471159 |
| H    | -1.685298 | 3.615986  | 0.285321  |
| H    | -1.128567 | 3.792944  | -1.247113 |
| O    | -4.452864 | -0.396941 | 0.736565  |
| H    | -5.388540 | -0.210075 | 0.908385  |
| H    | -4.285151 | -1.357260 | 0.699912  |
| O    | -0.864964 | 4.712574  | -2.453698 |
| H    | -1.476186 | 4.835563  | -3.194460 |
| H    | -0.070384 | 5.255302  | -2.560871 |
| O    | 0.663296  | -3.805449 | -0.897690 |
| H    | 1.183085  | -4.577031 | -1.170242 |
| H    | -0.239104 | -4.061417 | -0.629191 |

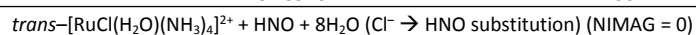

| Atom | X         | Y         | Z         |
|------|-----------|-----------|-----------|
| Ru   | 0.468745  | -0.127487 | -0.740075 |
| N    | -1.431231 | -0.974707 | -1.132932 |
| O    | 1.206969  | -1.189985 | -2.386415 |
| N    | -0.045705 | 1.472915  | -2.005461 |

|    |           |           |           |
|----|-----------|-----------|-----------|
| N  | 2.372199  | 0.720865  | -0.373836 |
| N  | 1.031106  | -1.746322 | 0.498476  |
| Cl | -0.434825 | 0.996112  | 1.171905  |
| N  | -3.651081 | 1.037863  | 0.887905  |
| H  | -3.377310 | 0.046737  | 1.174353  |
| O  | -4.222770 | 1.654279  | 1.805794  |
| H  | 1.505436  | -2.155324 | -2.244222 |
| H  | 1.716277  | -0.750990 | -3.082750 |
| H  | 1.710796  | -1.394554 | 1.195352  |
| H  | 0.225392  | -2.132064 | 0.983323  |
| H  | 1.454514  | -2.495135 | -0.054448 |
| H  | 2.644593  | 0.501053  | 0.593875  |
| H  | 3.073290  | 0.330141  | -0.998988 |
| H  | 2.328469  | 1.737994  | -0.524211 |
| H  | 0.532477  | 2.296355  | -1.776159 |
| H  | 0.102020  | 1.229774  | -2.982954 |
| H  | -1.051617 | 1.678697  | -1.882231 |
| H  | -1.885235 | -1.302050 | -0.269220 |
| H  | -2.028794 | -0.254199 | -1.550995 |
| H  | -1.340644 | -1.750456 | -1.784140 |
| O  | 2.839368  | -0.426057 | 2.227583  |
| H  | 2.413880  | 0.023303  | 2.973754  |
| H  | 3.746171  | -0.773240 | 2.483948  |
| O  | 0.562787  | 4.061126  | 1.225051  |
| H  | 0.132588  | 3.216134  | 1.464662  |
| H  | 0.032154  | 4.822761  | 1.501033  |
| O  | -4.683592 | -3.435037 | 1.073586  |
| H  | -4.563007 | -4.259834 | 0.580656  |
| H  | -5.587269 | -3.362289 | 1.414214  |
| O  | -2.876739 | -1.611461 | 1.359076  |
| H  | -3.574006 | -2.332359 | 1.262592  |
| H  | -2.364360 | -1.733605 | 2.173256  |
| O  | 1.732690  | 3.472451  | -0.997950 |
| H  | 1.323054  | 3.862069  | -0.166181 |
| H  | 2.282910  | 4.112827  | -1.471795 |
| O  | -2.841397 | 1.566848  | -1.651997 |
| H  | -3.230575 | 1.528906  | -0.728896 |
| H  | -3.483051 | 1.891484  | -2.301172 |
| O  | 5.189533  | -1.335721 | 2.843061  |
| H  | 5.362671  | -2.220114 | 3.197964  |
| H  | 6.009692  | -0.826250 | 2.766711  |
| O  | 1.912491  | -3.546430 | -1.819572 |
| H  | 2.844522  | -3.811811 | -1.858949 |
| H  | 1.330499  | -4.302821 | -1.992283 |
| Ru | 0.468745  | -0.127487 | -0.740075 |
| N  | -1.431231 | -0.974707 | -1.132932 |

*trans*-[RuCl(H<sub>2</sub>O)(NH<sub>3</sub>)<sub>4</sub>]<sup>2+</sup> + HNO<sup>+</sup>·H<sub>2</sub>O + 7H<sub>2</sub>O (NIMAG = 1)

| Atom | X         | Y         | Z         |
|------|-----------|-----------|-----------|
| Ru   | 0.205083  | -0.324104 | -0.454447 |
| N    | -1.368654 | -1.752485 | -0.195335 |
| O    | 0.924370  | -1.741130 | -1.767022 |
| N    | -0.458889 | 0.644883  | -2.232621 |
| N    | 1.933923  | 0.828738  | -0.806772 |
| N    | 1.183980  | -1.406202 | 1.091443  |
| Cl   | -0.000879 | 1.260946  | 1.503348  |
| N    | -2.138606 | 0.753658  | -0.152117 |
| H    | -2.505375 | 0.445581  | 0.805533  |
| O    | -2.520026 | 1.874176  | -0.558975 |
| H    | 1.289019  | -2.631343 | -1.433292 |
| H    | 0.931817  | -1.653142 | -2.729230 |
| H    | 2.014824  | -0.860730 | 1.377857  |
| H    | 0.565775  | -1.493545 | 1.892703  |



| Journal Name |           |           |           | ARTICLE |
|--------------|-----------|-----------|-----------|---------|
| H            | 1.467285  | -2.338050 | 0.786612  |         |
| H            | 2.504185  | 0.855792  | 0.050061  |         |
| H            | 2.483730  | 0.406856  | -1.551789 |         |
| H            | 1.642965  | 1.774162  | -1.097194 |         |
| H            | -0.436889 | 1.660737  | -2.091434 |         |
| H            | 0.158964  | 0.447593  | -3.016118 |         |
| H            | -1.395171 | 0.296705  | -2.455613 |         |
| H            | -1.892825 | -1.577839 | 0.668336  |         |
| H            | -1.985404 | -1.637317 | -1.008355 |         |
| H            | -1.006260 | -2.700768 | -0.182947 |         |
| O            | 3.339707  | 0.366720  | 1.655581  |         |
| H            | 3.098345  | 0.985087  | 2.362171  |         |
| H            | 4.314792  | 0.132865  | 1.691360  |         |
| O            | -0.235646 | 4.231905  | 0.481054  |         |
| H            | -0.302708 | 3.400376  | 1.000014  |         |
| H            | -1.006662 | 4.800989  | 0.622808  |         |
| O            | -5.141968 | -1.327365 | 2.857723  |         |
| H            | -5.387156 | -2.252083 | 3.007858  |         |
| H            | -5.898561 | -0.739509 | 2.998685  |         |
| O            | -2.800069 | -0.548666 | 2.105427  |         |
| H            | -3.709635 | -0.847781 | 2.415963  |         |
| H            | -2.220711 | -0.320837 | 2.848665  |         |
| O            | 0.658556  | 3.247568  | -1.738940 |         |
| H            | 0.303226  | 3.764494  | -0.952946 |         |
| H            | 0.990768  | 3.832730  | -2.435647 |         |
| O            | -2.842493 | -1.052497 | -2.647408 |         |
| H            | -3.748212 | -0.714718 | -2.553340 |         |
| H            | -2.789819 | -1.631977 | -3.425195 |         |
| O            | 5.858338  | -0.268700 | 1.706612  |         |
| H            | 6.229045  | -1.001502 | 2.220073  |         |
| H            | 6.551065  | 0.191677  | 1.210322  |         |
| O            | 1.830718  | -3.849570 | -0.730621 |         |
| H            | 2.781136  | -4.040812 | -0.756859 |         |
| H            | 1.315573  | -4.668905 | -0.669943 |         |

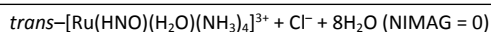

| Atom | X         | Y         | Z         |
|------|-----------|-----------|-----------|
| Ru   | -0.861632 | -0.129804 | -0.529858 |
| N    | -2.786671 | -0.078358 | 0.334470  |
| O    | -1.668297 | -1.513231 | -1.915689 |
| N    | -1.339591 | 1.532529  | -1.724665 |
| N    | 0.911656  | -0.259375 | -1.605073 |
| N    | -0.221599 | -1.760497 | 0.634032  |
| Cl   | 3.852157  | 0.981713  | 1.507421  |
| N    | -0.202570 | 1.027301  | 0.823010  |
| H    | -0.103423 | 0.618636  | 1.802724  |
| O    | 0.039235  | 2.260664  | 0.746341  |
| H    | -1.683641 | -2.502470 | -1.688968 |
| H    | -2.010074 | -1.312318 | -2.796959 |
| H    | 0.815729  | -1.824900 | 0.532339  |
| H    | -0.402207 | -1.588102 | 1.629578  |
| H    | -0.651372 | -2.635821 | 0.330337  |
| H    | 1.653151  | -0.712697 | -1.029235 |
| H    | 0.737116  | -0.828989 | -2.430254 |
| H    | 1.212150  | 0.690882  | -1.900944 |
| H    | -0.456408 | 2.051900  | -1.893681 |
| H    | -1.749345 | 1.284309  | -2.621712 |
| H    | -2.004911 | 2.134629  | -1.218718 |
| H    | -2.821937 | -0.318970 | 1.333249  |
| H    | -3.166985 | 0.879091  | 0.234018  |
| H    | -3.375749 | -0.727258 | -0.182884 |
| O    | 2.529665  | -1.534880 | 0.227691  |
| H    | 3.004088  | -0.816581 | 0.715247  |

## ARTICLE

## Journal Name

|   |           |           |           |
|---|-----------|-----------|-----------|
| H | 3.125459  | -2.314994 | 0.032752  |
| O | 2.984520  | 3.200987  | -0.459699 |
| H | 3.282573  | 2.510348  | 0.190016  |
| H | 2.970948  | 4.079331  | -0.052536 |
| O | -3.019953 | -0.449207 | 3.302688  |
| H | -3.426291 | -1.287226 | 3.577835  |
| H | -3.538846 | 0.299156  | 3.640046  |
| O | -0.429228 | -0.319138 | 3.121921  |
| H | -1.394891 | -0.349886 | 3.381733  |
| H | 0.167379  | -0.397649 | 3.880222  |
| O | 1.300048  | 2.429028  | -2.222527 |
| H | 1.947060  | 2.797009  | -1.526697 |
| H | 1.536562  | 2.725132  | -3.114339 |
| O | -3.423929 | 2.667589  | -0.092260 |
| H | -3.216106 | 3.291424  | 0.622382  |
| H | -4.241147 | 2.939452  | -0.540810 |
| O | 4.046227  | -3.589300 | -0.300052 |
| H | 4.177702  | -4.341681 | 0.295743  |
| H | 4.616239  | -3.663339 | -1.079743 |
| O | -1.580636 | -3.901778 | -1.089369 |
| H | -0.951759 | -4.542782 | -1.456315 |
| H | -2.375754 | -4.350444 | -0.761592 |

*trans*-[Ru(HNO)(H<sub>2</sub>O)(NH<sub>3</sub>)<sub>4</sub>]<sup>3+</sup> + 9H<sub>2</sub>O (NIMAG = 0)

| Atom | X         | Y         | Z         |
|------|-----------|-----------|-----------|
| Ru   | 0.306810  | -0.535841 | -0.709842 |
| N    | 0.021775  | -2.692749 | -0.741638 |
| O    | 2.441250  | -0.825775 | -0.422568 |
| N    | 0.693282  | -0.317867 | -2.783643 |
| N    | 0.366466  | 1.499316  | -0.415756 |
| N    | 0.161321  | -0.606997 | 1.389694  |
| O    | -1.766593 | 2.007076  | 1.029985  |
| N    | -1.553784 | -0.356714 | -1.102583 |
| H    | -2.205352 | 2.911220  | 1.091057  |
| H    | -2.233398 | -1.115727 | -0.784357 |
| H    | -2.199738 | 1.338647  | 1.598795  |
| O    | -2.073007 | 0.544137  | -1.793491 |
| H    | 3.154777  | -0.226001 | 0.036520  |
| H    | 2.864772  | -1.653035 | -0.698655 |
| H    | -0.784157 | -0.465344 | 1.786917  |
| H    | 0.533972  | -1.481468 | 1.755252  |
| H    | 0.793336  | 0.152455  | 1.730200  |
| H    | -0.524469 | 1.755332  | 0.141745  |
| H    | 1.159120  | 1.780619  | 0.169860  |
| H    | 0.345998  | 2.007565  | -1.308990 |
| H    | 0.133808  | -0.912793 | -3.394525 |
| H    | 0.468961  | 0.672236  | -3.041327 |
| H    | 1.677671  | -0.483447 | -2.990994 |
| H    | -0.943841 | -2.886930 | -0.430569 |
| H    | 0.125219  | -3.096439 | -1.673423 |
| H    | 0.665354  | -3.190584 | -0.128096 |
| O    | -2.422222 | -0.228731 | 2.602013  |
| H    | -3.165770 | -0.860824 | 2.444519  |
| H    | -2.408067 | 0.047927  | 3.533789  |
| O    | -2.904960 | 4.325762  | 1.206095  |
| H    | -3.688720 | 4.596679  | 0.704273  |
| H    | -2.642002 | 5.020076  | 1.829391  |
| O    | -2.909054 | -2.544570 | -0.257316 |
| H    | -3.430502 | -2.468385 | 0.591575  |
| H    | -3.401223 | -3.093038 | -0.892451 |
| O    | -4.340502 | -2.145928 | 1.995668  |
| H    | -5.234785 | -1.793960 | 1.833042  |
| H    | -4.394651 | -2.873439 | 2.641786  |

|   |           |           |           |
|---|-----------|-----------|-----------|
| O | 0.068852  | 2.356247  | -3.241472 |
| H | 0.621823  | 2.969539  | -3.755553 |
| H | -0.871307 | 2.561332  | -3.385313 |
| O | 4.234276  | 0.547041  | 0.734155  |
| H | 4.956180  | 0.043032  | 1.287754  |
| H | 4.660213  | 1.257870  | 0.226151  |
| O | 2.011217  | 1.418805  | 1.939885  |
| H | 1.943800  | 2.079334  | 2.647048  |
| H | 2.951971  | 1.194920  | 1.721100  |
| O | 6.014144  | -0.617709 | 2.063268  |
| H | 6.732147  | -1.141167 | 1.674759  |
| H | 6.188596  | -0.434963 | 2.999510  |

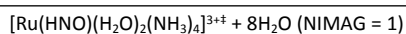

| Atom | X         | Y         | Z         |
|------|-----------|-----------|-----------|
| Ru   | -0.423849 | -0.262641 | -0.409071 |
| N    | 0.622964  | 0.607651  | -2.071607 |
| O    | -1.986060 | 0.889983  | -1.051015 |
| N    | -1.378362 | -1.845689 | -1.484787 |
| N    | -1.679186 | -0.839905 | 1.196507  |
| N    | 0.290863  | 1.436767  | 0.664072  |
| O    | 1.110097  | -1.183642 | 1.066679  |
| N    | 1.313881  | -1.741241 | -1.035215 |
| H    | 0.807871  | -1.952454 | 1.631692  |
| H    | 2.292133  | -1.340947 | -0.997719 |
| H    | 1.821715  | -0.603311 | 1.488262  |
| O    | 1.259967  | -2.966937 | -1.241209 |
| H    | -2.169007 | 1.850961  | -0.708639 |
| H    | -2.798689 | 0.458456  | -1.352467 |
| H    | 1.217337  | 1.260713  | 1.062935  |
| H    | 0.341871  | 2.292974  | 0.110556  |
| H    | -0.364403 | 1.608838  | 1.437897  |
| H    | -1.216400 | -1.512383 | 1.808586  |
| H    | -1.909393 | 0.012790  | 1.724986  |
| H    | -2.546958 | -1.263915 | 0.852180  |
| H    | -0.810753 | -2.690152 | -1.411087 |
| H    | -2.314329 | -2.045761 | -1.107516 |
| H    | -1.468484 | -1.623058 | -2.473915 |
| H    | 1.633161  | 0.647847  | -1.890020 |
| H    | 0.477306  | 0.072726  | -2.924256 |
| H    | 0.261070  | 1.543327  | -2.232873 |
| O    | 2.795760  | 0.508739  | 1.984414  |
| H    | 3.653265  | 0.682464  | 1.508144  |
| H    | 2.861309  | 0.706656  | 2.930051  |
| O    | 0.033647  | -3.053249 | 2.508482  |
| H    | -0.142424 | -3.938976 | 2.154023  |
| H    | 0.147111  | -3.089520 | 3.471083  |
| O    | 3.435470  | -0.083183 | -1.489581 |
| H    | 4.028630  | 0.313388  | -0.799534 |
| H    | 3.932040  | -0.254559 | -2.305281 |
| O    | 4.953922  | 0.927222  | 0.501988  |
| H    | 5.733584  | 0.384538  | 0.706420  |
| H    | 5.213503  | 1.857923  | 0.400106  |
| O    | -3.913694 | -2.212890 | -0.134751 |
| H    | -4.730967 | -1.762026 | -0.402024 |
| H    | -4.122043 | -3.103481 | 0.191285  |
| O    | -2.402601 | 3.177118  | -0.109676 |
| H    | -1.591028 | 3.780470  | -0.221111 |
| H    | -3.228164 | 3.623753  | -0.351686 |
| O    | -2.097518 | 1.838360  | 2.225271  |
| H    | -2.320275 | 2.151979  | 3.114097  |
| H    | -2.411309 | 2.460213  | 1.523293  |
| O    | -0.200497 | 4.411560  | -0.373364 |

|   |          |          |           |
|---|----------|----------|-----------|
| H | 0.108533 | 4.703299 | -1.245144 |
| H | 0.164499 | 4.975712 | 0.326083  |

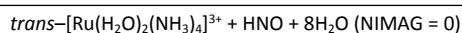

| Atom | X         | Y         | Z         |
|------|-----------|-----------|-----------|
| Ru   | -0.114406 | -0.443786 | 0.064864  |
| N    | 0.783530  | 0.445573  | -1.652779 |
| O    | -1.815142 | -0.840930 | -1.029589 |
| N    | 0.676666  | -2.376838 | -0.436777 |
| N    | -1.059984 | -1.258939 | 1.765910  |
| N    | -0.847040 | 1.448182  | 0.682548  |
| O    | 1.547708  | -0.057416 | 1.102018  |
| N    | 3.876834  | -0.640311 | -2.687109 |
| H    | 2.369855  | -0.641999 | 0.988223  |
| H    | 4.389543  | -0.521846 | -3.596290 |
| H    | 1.674196  | 0.810615  | 1.630304  |
| O    | 4.630137  | -1.115772 | -1.819128 |
| H    | -2.796157 | -0.500582 | -0.912567 |
| H    | -1.790992 | -1.548890 | -1.691010 |
| H    | -0.275623 | 1.786600  | 1.460699  |
| H    | -0.765356 | 2.152325  | -0.053358 |
| H    | -1.817726 | 1.356476  | 1.012972  |
| H    | -0.483439 | -1.091542 | 2.588860  |
| H    | -1.964418 | -0.776337 | 1.895990  |
| H    | -1.199424 | -2.273536 | 1.679729  |
| H    | 1.646142  | -2.422669 | -0.104269 |
| H    | 0.141660  | -3.114351 | 0.046388  |
| H    | 0.690622  | -2.592360 | -1.432049 |
| H    | 0.930518  | 1.455251  | -1.461488 |
| H    | 1.676401  | 0.029612  | -1.926148 |
| H    | 0.150927  | 0.375575  | -2.448997 |
| O    | 1.683089  | 2.142366  | 2.336328  |
| H    | 1.997078  | 2.978340  | 1.894184  |
| H    | 1.816227  | 2.178068  | 3.296662  |
| O    | 3.451153  | -1.679853 | 0.623681  |
| H    | 4.021183  | -1.511328 | -0.162029 |
| H    | 3.934607  | -2.171545 | 1.307303  |
| O    | 0.832237  | 3.225500  | -1.058839 |
| H    | 1.407928  | 3.678475  | -0.396935 |
| H    | 0.628549  | 3.829090  | -1.792221 |
| O    | 2.373393  | 4.368663  | 0.990184  |
| H    | 3.317375  | 4.509587  | 0.795605  |
| H    | 1.990097  | 5.195682  | 1.334692  |
| O    | -0.921425 | -4.183167 | 1.249696  |
| H    | -1.660204 | -4.720108 | 0.914274  |
| H    | -0.444195 | -4.701777 | 1.921306  |
| O    | -4.236154 | -0.185677 | -0.761980 |
| H    | -4.690664 | 0.567493  | -1.314890 |
| H    | -4.829422 | -0.955586 | -0.728301 |
| O    | -3.340408 | 0.478291  | 1.700919  |
| H    | -3.856685 | 0.778192  | 2.466098  |
| H    | -3.910008 | 0.302042  | 0.911829  |
| O    | -5.420613 | 1.590931  | -2.079444 |
| H    | -5.544774 | 1.569237  | -3.040891 |
| H    | -6.001818 | 2.251204  | -1.671012 |

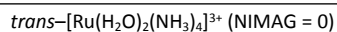

| Atom | X         | Y         | Z         |
|------|-----------|-----------|-----------|
| Ru   | 0.000012  | 0.000006  | -0.000015 |
| N    | -1.528688 | 1.508439  | 0.001989  |
| O    | -0.001201 | 0.001894  | -2.051472 |
| N    | 1.532359  | 1.504754  | 0.000467  |
| N    | 1.528679  | -1.508535 | -0.002035 |
| N    | -1.532299 | -1.504876 | -0.000389 |

|   |           |           |           |
|---|-----------|-----------|-----------|
| O | 0.001100  | -0.001680 | 2.051497  |
| H | 0.002453  | 0.796376  | 2.613555  |
| H | 0.000313  | -0.800429 | 2.612625  |
| H | -0.002681 | -0.795931 | -2.613913 |
| H | -0.000358 | 0.800862  | -2.612286 |
| H | -1.191654 | -2.469016 | -0.001616 |
| H | -2.145118 | -1.425061 | 0.816674  |
| H | -2.146400 | -1.423483 | -0.816337 |
| H | 2.142963  | -1.429493 | 0.814008  |
| H | 1.186123  | -2.472003 | -0.002140 |
| H | 2.141613  | -1.428833 | -0.819026 |
| H | 2.146119  | 1.423268  | 0.816660  |
| H | 2.145457  | 1.424587  | -0.816357 |
| H | 1.192033  | 2.469010  | 0.001370  |
| H | -2.141884 | 1.428205  | 0.818730  |
| H | -1.186452 | 2.472025  | 0.002604  |
| H | -2.142619 | 1.429479  | -0.814319 |

| <i>trans</i> -[Ru(H <sub>2</sub> O) <sub>2</sub> (NH <sub>3</sub> ) <sub>4</sub> ] <sup>2+</sup> (NIMAG = 0) |           |           |           |           |
|--------------------------------------------------------------------------------------------------------------|-----------|-----------|-----------|-----------|
| Atom                                                                                                         | X         | Y         | Z         |           |
| Ru                                                                                                           | 0.000009  | 0.000009  | 0.000009  | 0.000008  |
| N                                                                                                            | -0.069341 | 1.925708  | 0.965709  | 0.965709  |
| O                                                                                                            | -2.146091 | 0.006278  | -0.004050 | -0.004050 |
| N                                                                                                            | 0.079744  | 0.965639  | -1.925296 | -1.925296 |
| N                                                                                                            | -0.077129 | -1.925225 | -0.966004 | -0.966004 |
| N                                                                                                            | 0.066686  | -0.966082 | 1.925589  | 1.925589  |
| O                                                                                                            | 2.146097  | -0.006355 | 0.004016  | 0.004016  |
| H                                                                                                            | 2.697400  | -0.719806 | -0.352092 | -0.352092 |
| H                                                                                                            | 2.700311  | 0.703765  | 0.362256  | 0.362256  |
| H                                                                                                            | -2.701207 | -0.349053 | 0.706824  | 0.706824  |
| H                                                                                                            | -2.696495 | 0.364888  | -0.716941 | -0.716941 |
| H                                                                                                            | 1.047425  | -1.095041 | 2.176619  | 2.176619  |
| H                                                                                                            | -0.364662 | -0.427015 | 2.676361  | 2.676361  |
| H                                                                                                            | -0.369214 | -1.888018 | 1.943496  | 1.943496  |
| H                                                                                                            | 0.351250  | -2.678090 | -0.427491 | -0.427491 |
| H                                                                                                            | -1.059230 | -2.171517 | -1.093751 | -1.093751 |
| H                                                                                                            | 0.357542  | -1.945251 | -1.888479 | -1.888479 |
| H                                                                                                            | 1.062178  | 1.088875  | -2.172547 | -2.172547 |
| H                                                                                                            | -0.351837 | 0.429071  | -2.677721 | -2.677721 |
| H                                                                                                            | -0.350712 | 1.890101  | -1.944913 | -1.944913 |
| H                                                                                                            | 0.361726  | 1.943159  | 1.889931  | 1.889931  |
| H                                                                                                            | 0.365777  | 2.675900  | 0.428861  | 0.428861  |
| H                                                                                                            | -1.050425 | 2.177982  | 1.089502  | 1.089502  |

| HNO (NIMAG = 0) |           |           |          |          |
|-----------------|-----------|-----------|----------|----------|
| Atom            | X         | Y         | Z        |          |
| H               | -2.941935 | -0.511927 | 1.133820 | 1.133820 |
| N               | -2.124484 | -1.089585 | 0.795407 | 0.795407 |
| O               | -2.513865 | -2.229771 | 0.494340 | 0.494340 |

| HNO <sup>+</sup> (NIMAG = 0) |           |           |          |          |
|------------------------------|-----------|-----------|----------|----------|
| Atom                         | X         | Y         | Z        |          |
| N                            | -2.227554 | -1.158818 | 0.791676 | 0.791676 |
| H                            | -2.911388 | -0.429618 | 1.155107 | 1.155107 |
| O                            | -2.441342 | -2.242847 | 0.476784 | 0.476784 |

| H <sub>2</sub> O (NIMAG = 0) |          |           |           |           |
|------------------------------|----------|-----------|-----------|-----------|
| Atom                         | X        | Y         | Z         |           |
| O                            | 2.165606 | -0.002100 | 0.017104  | 0.017104  |
| H                            | 2.684513 | 0.242812  | -0.766432 | -0.766432 |
| H                            | 2.676920 | 0.204209  | 0.816579  | 0.816579  |

| H <sub>3</sub> O <sup>+</sup> (NIMAG = 0) |           |           |           |           |
|-------------------------------------------|-----------|-----------|-----------|-----------|
| Atom                                      | X         | Y         | Z         |           |
| O                                         | -2.438338 | -2.283036 | 0.419278  | 0.419278  |
| H                                         | -2.348430 | -1.746182 | 1.221378  | 1.221378  |
| H                                         | -2.671335 | -3.221378 | 0.488032  | 0.488032  |
| H                                         | -2.334033 | -1.872394 | -0.452590 | -0.452590 |

| NO (NIMAG = 0) |          |          |          |          |
|----------------|----------|----------|----------|----------|
| Atom           | X        | Y        | Z        |          |
| N              | 0.000000 | 0.000000 | 0.110015 | 0.110015 |
| O              | 0.000000 | 0.000000 | 1.289985 | 1.289985 |

| <i>trans</i> -[Ru(NO)(NH <sub>3</sub> ) <sub>4</sub> (P(OEt) <sub>3</sub> )] <sup>3+</sup> (NIMAG = 0) |           |           |           |  |
|--------------------------------------------------------------------------------------------------------|-----------|-----------|-----------|--|
| Atom                                                                                                   | X         | Y         | Z         |  |
| Ru                                                                                                     | 1.607374  | -0.085500 | -0.060464 |  |
| N                                                                                                      | 1.424911  | -1.497199 | 1.514103  |  |
| H                                                                                                      | 2.121524  | -1.339586 | 2.240289  |  |
| H                                                                                                      | 0.497042  | -1.409032 | 1.939272  |  |
| H                                                                                                      | 1.538630  | -2.457038 | 1.195970  |  |
| P                                                                                                      | -0.863968 | -0.102005 | -0.079854 |  |
| N                                                                                                      | 1.245564  | 1.470487  | 1.344433  |  |
| H                                                                                                      | 2.110334  | 1.943837  | 1.599171  |  |
| H                                                                                                      | 0.611946  | 2.174368  | 0.963906  |  |
| H                                                                                                      | 0.824218  | 1.114718  | 2.201583  |  |
| N                                                                                                      | 1.465325  | 1.371560  | -1.592553 |  |
| H                                                                                                      | 2.164248  | 2.101912  | -1.470318 |  |
| H                                                                                                      | 1.593423  | 0.982093  | -2.524168 |  |
| H                                                                                                      | 0.539290  | 1.807199  | -1.553395 |  |
| N                                                                                                      | 1.654639  | -1.624249 | -1.525566 |  |
| H                                                                                                      | 2.571875  | -1.670847 | -1.965742 |  |
| H                                                                                                      | 1.466096  | -2.542378 | -1.127401 |  |
| H                                                                                                      | 0.976579  | -1.475754 | -2.271196 |  |
| N                                                                                                      | 3.357921  | -0.000221 | 0.065691  |  |
| O                                                                                                      | 4.509945  | 0.052309  | 0.174978  |  |
| O                                                                                                      | -1.940267 | -0.967779 | -1.012775 |  |
| C                                                                                                      | -2.356799 | -2.379388 | -0.799003 |  |
| H                                                                                                      | -2.405482 | -2.575560 | 0.272593  |  |
| H                                                                                                      | -1.598828 | -3.017546 | -1.250515 |  |
| C                                                                                                      | -3.698720 | -2.539118 | -1.462260 |  |
| H                                                                                                      | -3.637208 | -2.310288 | -2.526124 |  |
| H                                                                                                      | -4.444908 | -1.892917 | -0.999974 |  |
| H                                                                                                      | -4.024843 | -3.575790 | -1.353172 |  |
| O                                                                                                      | -1.241630 | -0.390088 | 1.519078  |  |
| C                                                                                                      | -2.566666 | -0.282423 | 2.189386  |  |
| H                                                                                                      | -2.743313 | -1.267760 | 2.615929  |  |
| H                                                                                                      | -3.331031 | -0.079354 | 1.437446  |  |
| C                                                                                                      | -2.498832 | 0.789357  | 3.245235  |  |
| H                                                                                                      | -2.313905 | 1.771896  | 2.809928  |  |
| H                                                                                                      | -1.716026 | 0.569540  | 3.971369  |  |
| H                                                                                                      | -3.453915 | 0.825062  | 3.774018  |  |
| O                                                                                                      | -1.229050 | 1.453134  | -0.545131 |  |
| C                                                                                                      | -2.580511 | 2.013401  | -0.821233 |  |
| H                                                                                                      | -2.981692 | 2.352585  | 0.133166  |  |
| H                                                                                                      | -3.201333 | 1.215958  | -1.227496 |  |
| C                                                                                                      | -2.404153 | 3.149213  | -1.793310 |  |
| H                                                                                                      | -2.007780 | 2.795278  | -2.745356 |  |
| H                                                                                                      | -1.738984 | 3.912517  | -1.388626 |  |
| H                                                                                                      | -3.377315 | 3.609457  | -1.977781 |  |
| <i>trans</i> -[Ru(NO)(NH <sub>3</sub> ) <sub>4</sub> (P(OEt) <sub>3</sub> )] <sup>2+</sup> (NIMAG = 0) |           |           |           |  |
| Atom                                                                                                   | X         | Y         | Z         |  |
| Ru                                                                                                     | 1.573308  | -0.151519 | -0.089094 |  |
| N                                                                                                      | 1.438672  | -1.321672 | 1.691522  |  |
| H                                                                                                      | 2.213236  | -1.115054 | 2.317246  |  |
| H                                                                                                      | 0.566350  | -1.091181 | 2.170739  |  |
| H                                                                                                      | 1.446794  | -2.322638 | 1.513977  |  |
| P                                                                                                      | -0.839436 | -0.106038 | -0.067988 |  |
| N                                                                                                      | 1.416901  | 1.582417  | 1.139898  |  |
| H                                                                                                      | 2.325464  | 1.840271  | 1.521356  |  |
| H                                                                                                      | 1.059883  | 2.384442  | 0.624165  |  |
| H                                                                                                      | 0.780267  | 1.416962  | 1.918458  |  |
| N                                                                                                      | 1.461477  | 1.093526  | -1.815577 |  |
| H                                                                                                      | 2.157426  | 1.834446  | -1.777956 |  |
| H                                                                                                      | 1.612766  | 0.575339  | -2.677196 |  |
| H                                                                                                      | 0.532706  | 1.520099  | -1.854203 |  |

|   |           |           |           |
|---|-----------|-----------|-----------|
| N | 1.795758  | -1.881265 | -1.327501 |
| H | 2.754205  | -1.903586 | -1.669775 |
| H | 1.631048  | -2.748821 | -0.822531 |
| H | 1.173287  | -1.878487 | -2.132165 |
| N | 3.427673  | -0.027958 | 0.003525  |
| O | 4.337480  | 0.617974  | 0.478659  |
| O | -2.057341 | -1.096110 | -0.709270 |
| C | -2.226129 | -2.511396 | -0.332732 |
| H | -2.238733 | -2.592597 | 0.756170  |
| H | -1.381139 | -3.079423 | -0.723697 |
| C | -3.527147 | -2.978056 | -0.934769 |
| H | -3.509592 | -2.879095 | -2.020500 |
| H | -4.367005 | -2.405496 | -0.540032 |
| H | -3.681237 | -4.030749 | -0.688255 |
| O | -1.219317 | -0.011055 | 1.577813  |
| C | -2.564229 | 0.133579  | 2.169865  |
| H | -2.660087 | -0.694091 | 2.871480  |
| H | -3.315841 | 0.012550  | 1.386865  |
| C | -2.672117 | 1.467657  | 2.867537  |
| H | -2.570852 | 2.297505  | 2.166516  |
| H | -1.903994 | 1.564228  | 3.635626  |
| H | -3.649495 | 1.545077  | 3.349077  |
| O | -1.270661 | 1.324473  | -0.835217 |
| C | -2.640114 | 1.778405  | -1.150951 |
| H | -3.096059 | 2.134566  | -0.226041 |
| H | -3.205572 | 0.929188  | -1.531860 |
| C | -2.521108 | 2.884926  | -2.167860 |
| H | -2.062466 | 2.521533  | -3.088272 |
| H | -1.927042 | 3.712201  | -1.778020 |
| H | -3.517937 | 3.261936  | -2.406726 |

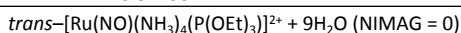

| Atom | X         | Y         | Z         |
|------|-----------|-----------|-----------|
| Ru   | -1.142303 | -0.674706 | 0.378488  |
| N    | -0.753944 | -0.764337 | 2.485441  |
| H    | -1.254868 | -1.542125 | 2.906845  |
| H    | 0.235621  | -0.888731 | 2.688393  |
| H    | -1.075860 | 0.111219  | 2.924896  |
| P    | 1.154795  | 0.072087  | 0.079658  |
| N    | -0.543439 | -2.713082 | 0.146562  |
| H    | -1.380510 | -3.294050 | 0.147219  |
| H    | -0.024301 | -2.918572 | -0.715721 |
| H    | 0.068354  | -3.041348 | 0.896205  |
| N    | -1.331518 | -0.469214 | -1.724813 |
| H    | -2.256518 | -0.802426 | -2.016320 |
| H    | -1.247544 | 0.531548  | -1.977210 |
| H    | -0.609028 | -0.986910 | -2.218154 |
| N    | -1.896825 | 1.307511  | 0.523206  |
| H    | -2.894377 | 1.258745  | 0.232962  |
| H    | -1.824015 | 1.675705  | 1.473599  |
| H    | -1.440984 | 1.922578  | -0.155782 |
| O    | -4.415224 | 1.132626  | -0.662351 |
| H    | -4.433937 | 0.348205  | -1.256691 |
| H    | -5.325131 | 1.435137  | -0.407886 |
| N    | -2.854126 | -1.323208 | 0.598491  |
| O    | -3.523913 | -2.342094 | 0.508937  |
| O    | 1.684550  | 1.710299  | 0.106304  |
| C    | 1.462084  | 2.597486  | 1.270608  |
| H    | 1.527771  | 2.008262  | 2.186518  |
| H    | 0.457634  | 3.011718  | 1.186206  |
| C    | 2.512126  | 3.680187  | 1.240147  |
| H    | 2.443664  | 4.266071  | 0.322883  |
| H    | 3.513777  | 3.257047  | 1.317272  |

|                                                                                                                                              |           |           |           |
|----------------------------------------------------------------------------------------------------------------------------------------------|-----------|-----------|-----------|
| H                                                                                                                                            | 2.355621  | 4.353321  | 2.085590  |
| O                                                                                                                                            | 2.264327  | -0.637715 | 1.180285  |
| C                                                                                                                                            | 3.557986  | -0.009991 | 1.582181  |
| H                                                                                                                                            | 3.349495  | 0.583507  | 2.471799  |
| H                                                                                                                                            | 3.906427  | 0.643144  | 0.782501  |
| C                                                                                                                                            | 4.556779  | -1.100812 | 1.878090  |
| H                                                                                                                                            | 4.750399  | -1.718156 | 0.999756  |
| H                                                                                                                                            | 4.230753  | -1.736979 | 2.702213  |
| H                                                                                                                                            | 5.499251  | -0.633935 | 2.173484  |
| O                                                                                                                                            | 1.683050  | -0.316829 | -1.455170 |
| C                                                                                                                                            | 3.097293  | -0.351221 | -1.889753 |
| H                                                                                                                                            | 3.549445  | -1.240063 | -1.445720 |
| H                                                                                                                                            | 3.614323  | 0.536523  | -1.522551 |
| C                                                                                                                                            | 3.099898  | -0.426426 | -3.395245 |
| H                                                                                                                                            | 2.633403  | 0.457707  | -3.831137 |
| H                                                                                                                                            | 2.569097  | -1.313022 | -3.744416 |
| H                                                                                                                                            | 4.131376  | -0.481669 | -3.750376 |
| O                                                                                                                                            | -1.044396 | 2.326361  | -2.122027 |
| H                                                                                                                                            | -1.733758 | 2.879102  | -2.519122 |
| H                                                                                                                                            | -0.124878 | 2.700790  | -2.283366 |
| O                                                                                                                                            | -4.175233 | -1.102349 | -2.268765 |
| H                                                                                                                                            | -4.497608 | -1.930606 | -1.875289 |
| H                                                                                                                                            | -4.458871 | -1.044310 | -3.195688 |
| O                                                                                                                                            | 2.148580  | -3.349537 | 1.148037  |
| H                                                                                                                                            | 2.308160  | -2.382713 | 1.278316  |
| H                                                                                                                                            | 2.536571  | -3.883870 | 1.856066  |
| O                                                                                                                                            | -6.837482 | 1.969453  | 0.036308  |
| H                                                                                                                                            | -7.342605 | 1.633579  | 0.792025  |
| H                                                                                                                                            | -7.335973 | 2.658972  | -0.427452 |
| O                                                                                                                                            | 5.293603  | 1.843175  | -0.650343 |
| H                                                                                                                                            | 5.243230  | 2.808018  | -0.749401 |
| H                                                                                                                                            | 6.218142  | 1.561029  | -0.745552 |
| O                                                                                                                                            | 1.544699  | -3.960300 | -1.349886 |
| H                                                                                                                                            | 1.947353  | -3.830283 | -0.447928 |
| H                                                                                                                                            | 2.208521  | -3.883786 | -2.051352 |
| O                                                                                                                                            | 1.416791  | 3.091897  | -2.173168 |
| H                                                                                                                                            | 1.740562  | 2.587582  | -1.387207 |
| H                                                                                                                                            | 2.089565  | 3.182486  | -2.862434 |
| O                                                                                                                                            | -1.705091 | 1.755881  | 3.475080  |
| H                                                                                                                                            | -2.570690 | 1.804010  | 3.912589  |
| H                                                                                                                                            | -1.089760 | 2.377310  | 3.896789  |
| [Ru(H <sub>2</sub> O)(NO)(NH <sub>3</sub> ) <sub>4</sub> (P(OEt) <sub>3</sub> ) <sub>2</sub> ] <sup>2+</sup> + 8H <sub>2</sub> O (NIMAG = 1) |           |           |           |
| Atom                                                                                                                                         | X         | Y         | Z         |
| Ru                                                                                                                                           | -1.260257 | 0.094173  | -0.051627 |
| N                                                                                                                                            | -1.127982 | 0.520637  | -2.165008 |
| H                                                                                                                                            | -1.888065 | 1.154530  | -2.399273 |
| H                                                                                                                                            | -0.249511 | 0.962265  | -2.423548 |
| H                                                                                                                                            | -1.229235 | -0.342755 | -2.713013 |
| P                                                                                                                                            | 0.970116  | -0.066421 | -0.047132 |
| N                                                                                                                                            | -0.845439 | 2.015916  | 0.885685  |
| H                                                                                                                                            | -1.675722 | 2.360853  | 1.360875  |
| H                                                                                                                                            | -0.104056 | 1.903198  | 1.575369  |
| H                                                                                                                                            | -0.531724 | 2.713808  | 0.200811  |
| N                                                                                                                                            | -1.356597 | -0.560409 | 1.966508  |
| H                                                                                                                                            | -2.256089 | -0.318727 | 2.391384  |
| H                                                                                                                                            | -1.242403 | -1.586867 | 1.987524  |
| H                                                                                                                                            | -0.608756 | -0.158609 | 2.527362  |
| N                                                                                                                                            | -1.645985 | -1.893768 | -0.616933 |
| H                                                                                                                                            | -2.651684 | -1.905544 | -0.410612 |
| H                                                                                                                                            | -1.475701 | -2.125147 | -1.597721 |
| H                                                                                                                                            | -1.191472 | -2.559787 | 0.019766  |
| O                                                                                                                                            | -3.805106 | -0.696800 | 0.393105  |



|                                                                                                                                                             |           |           |           |
|-------------------------------------------------------------------------------------------------------------------------------------------------------------|-----------|-----------|-----------|
| H                                                                                                                                                           | -4.056261 | -0.543025 | 1.337126  |
| H                                                                                                                                                           | -4.524504 | -0.395336 | -0.226368 |
| N                                                                                                                                                           | -2.948877 | 1.659405  | -0.688078 |
| O                                                                                                                                                           | -3.449932 | 2.457212  | 0.081172  |
| O                                                                                                                                                           | 1.852459  | -1.519608 | -0.272461 |
| C                                                                                                                                                           | 1.827804  | -2.276362 | -1.545681 |
| H                                                                                                                                                           | 1.743649  | -1.571864 | -2.374264 |
| H                                                                                                                                                           | 0.947578  | -2.918481 | -1.531563 |
| C                                                                                                                                                           | 3.101648  | -3.078684 | -1.635386 |
| H                                                                                                                                                           | 3.184595  | -3.776873 | -0.801779 |
| H                                                                                                                                                           | 3.974057  | -2.425436 | -1.640593 |
| H                                                                                                                                                           | 3.094746  | -3.655596 | -2.562541 |
| O                                                                                                                                                           | 1.757575  | 0.968267  | -1.168143 |
| C                                                                                                                                                           | 3.156120  | 0.799522  | -1.653568 |
| H                                                                                                                                                           | 3.078823  | 0.359028  | -2.647293 |
| H                                                                                                                                                           | 3.688744  | 0.113320  | -0.995187 |
| C                                                                                                                                                           | 3.826486  | 2.150478  | -1.703740 |
| H                                                                                                                                                           | 3.862684  | 2.616148  | -0.717941 |
| H                                                                                                                                                           | 3.323212  | 2.826632  | -2.395958 |
| H                                                                                                                                                           | 4.853111  | 2.016888  | -2.052385 |
| O                                                                                                                                                           | 1.562503  | 0.340554  | 1.469294  |
| C                                                                                                                                                           | 2.983629  | 0.566086  | 1.812669  |
| H                                                                                                                                                           | 3.234689  | 1.577705  | 1.488809  |
| H                                                                                                                                                           | 3.608609  | -0.148788 | 1.276513  |
| C                                                                                                                                                           | 3.112439  | 0.419949  | 3.307755  |
| H                                                                                                                                                           | 2.848359  | -0.589409 | 3.625242  |
| H                                                                                                                                                           | 2.471164  | 1.132420  | 3.828303  |
| H                                                                                                                                                           | 4.147075  | 0.613294  | 3.599936  |
| O                                                                                                                                                           | -0.726302 | -3.342387 | 1.717157  |
| H                                                                                                                                                           | -1.206936 | -4.129420 | 2.012527  |
| H                                                                                                                                                           | 0.267900  | -3.431655 | 1.851033  |
| O                                                                                                                                                           | -4.140307 | -0.168333 | 3.004988  |
| H                                                                                                                                                           | -4.464177 | 0.709420  | 3.262670  |
| H                                                                                                                                                           | -4.421689 | -0.832404 | 3.654122  |
| O                                                                                                                                                           | 0.716128  | 3.455278  | -1.069431 |
| H                                                                                                                                                           | 1.167953  | 2.591063  | -1.245765 |
| H                                                                                                                                                           | 0.431427  | 3.886440  | -1.889616 |
| O                                                                                                                                                           | -5.758498 | -0.010366 | -1.254360 |
| H                                                                                                                                                           | -5.840461 | 0.812113  | -1.760222 |
| H                                                                                                                                                           | -6.444669 | -0.642073 | -1.517835 |
| O                                                                                                                                                           | 5.513465  | -0.827884 | 0.127427  |
| H                                                                                                                                                           | 5.764462  | -1.763001 | 0.204801  |
| H                                                                                                                                                           | 6.311980  | -0.277913 | 0.186592  |
| O                                                                                                                                                           | 1.903935  | 4.877138  | 0.885632  |
| H                                                                                                                                                           | 1.478482  | 4.394968  | 0.129002  |
| H                                                                                                                                                           | 2.788097  | 5.185573  | 0.633669  |
| O                                                                                                                                                           | 1.845622  | -3.267810 | 1.774526  |
| H                                                                                                                                                           | 2.043208  | -2.580104 | 1.093674  |
| H                                                                                                                                                           | 2.510039  | -3.299975 | 2.476739  |
| O                                                                                                                                                           | -1.447579 | -2.034939 | -3.555545 |
| H                                                                                                                                                           | -2.301533 | -2.233951 | -3.972858 |
| H                                                                                                                                                           | -0.726753 | -2.385196 | -4.103333 |
| <i>trans</i> -[Ru(H <sub>2</sub> O)(NH <sub>3</sub> ) <sub>4</sub> (P(OEt) <sub>3</sub> ) <sub>2</sub> ] <sup>2+</sup> + NO + 8H <sub>2</sub> O (NIMAG = 0) |           |           |           |
| Atom                                                                                                                                                        | X         | Y         | Z         |
| Ru                                                                                                                                                          | 0.988243  | -0.654137 | -0.134391 |
| N                                                                                                                                                           | 1.631488  | 0.046957  | 1.779598  |
| H                                                                                                                                                           | 2.653526  | 0.043113  | 1.808438  |
| H                                                                                                                                                           | 1.303225  | 0.988675  | 1.972585  |
| H                                                                                                                                                           | 1.280165  | -0.581264 | 2.510660  |
| P                                                                                                                                                           | -1.049433 | 0.183686  | 0.013040  |
| N                                                                                                                                                           | 1.780635  | 1.095562  | -1.055446 |
| H                                                                                                                                                           | 2.731542  | 0.866787  | -1.335417 |

| ARTICLE |           |           | Journal Name |
|---------|-----------|-----------|--------------|
| H       | 1.269441  | 1.427610  | -1.874302    |
| H       | 1.800412  | 1.888151  | -0.410594    |
| N       | 0.527883  | -1.460839 | -2.054277    |
| H       | 1.389431  | -1.699057 | -2.547438    |
| H       | -0.046291 | -2.307306 | -1.934176    |
| H       | -0.003758 | -0.789350 | -2.602071    |
| N       | 0.570604  | -2.552369 | 0.709461     |
| H       | 1.457181  | -3.042500 | 0.601528     |
| H       | 0.349935  | -2.509104 | 1.705746     |
| H       | -0.148981 | -3.054580 | 0.176161     |
| O       | 2.925952  | -1.470091 | -0.367696    |
| H       | 3.220790  | -1.774640 | -1.269377    |
| H       | 3.658399  | -1.148822 | 0.228059     |
| N       | 6.158481  | 2.044360  | 0.493232     |
| O       | 7.197269  | 2.566211  | 0.672242     |
| O       | -2.437296 | -0.652267 | 0.672661     |
| C       | -2.432146 | -1.114791 | 2.068615     |
| H       | -1.870963 | -0.402092 | 2.677076     |
| H       | -1.926119 | -2.080320 | 2.106622     |
| C       | -3.861813 | -1.229738 | 2.541728     |
| H       | -4.418063 | -1.938506 | 1.926443     |
| H       | -4.364280 | -0.262875 | 2.505517     |
| H       | -3.875830 | -1.589689 | 3.572724     |
| O       | -1.249978 | 1.688669  | 0.873626     |
| C       | -2.502911 | 2.155522  | 1.505861     |
| H       | -2.446354 | 1.881572  | 2.560486     |
| H       | -3.352856 | 1.644935  | 1.055536     |
| C       | -2.618312 | 3.653725  | 1.344500     |
| H       | -2.637528 | 3.939894  | 0.291808     |
| H       | -1.799553 | 4.179363  | 1.837973     |
| H       | -3.552751 | 3.986570  | 1.802501     |
| O       | -1.749707 | 0.477360  | -1.503104    |
| C       | -2.969097 | 1.261320  | -1.738865    |
| H       | -2.726425 | 2.314640  | -1.578801    |
| H       | -3.744249 | 0.966687  | -1.030526    |
| C       | -3.399056 | 1.016398  | -3.165338    |
| H       | -3.639781 | -0.035971 | -3.323432    |
| H       | -2.613434 | 1.304709  | -3.865497    |
| H       | -4.289773 | 1.609554  | -3.385152    |
| O       | -1.201335 | -3.666053 | -1.313705    |
| H       | -1.179150 | -4.595561 | -1.584754    |
| H       | -2.145437 | -3.318588 | -1.233473    |
| O       | 3.425092  | -2.231442 | -2.815266    |
| H       | 3.901144  | -1.663345 | -3.441127    |
| H       | 3.553883  | -3.165919 | -3.041632    |
| O       | 0.649216  | 3.414277  | 0.280945     |
| H       | -0.095072 | 2.837345  | 0.615997     |
| H       | 0.898632  | 4.103993  | 0.912759     |
| O       | 4.622659  | -0.482458 | 1.345969     |
| H       | 5.185221  | 0.280077  | 1.119049     |
| H       | 5.050660  | -1.034486 | 2.018758     |
| O       | -5.667569 | 1.280860  | 0.348338     |
| H       | -6.166870 | 0.488734  | 0.606816     |
| H       | -6.285195 | 2.020810  | 0.227122     |
| O       | 0.519762  | 3.447498  | -2.373321    |
| H       | 0.533188  | 3.597304  | -1.388146    |
| H       | -0.281513 | 3.822514  | -2.769648    |
| O       | -3.467984 | -2.512869 | -0.897391    |
| H       | -3.204132 | -1.724948 | -0.347373    |
| H       | -4.198397 | -2.314580 | -1.499983    |
| O       | 0.653131  | -2.030011 | 3.645082     |
| H       | 1.340167  | -2.586840 | 4.047128     |

| H                                                                                                                     | -0.042713 | -1.853725 | 4.298996  |
|-----------------------------------------------------------------------------------------------------------------------|-----------|-----------|-----------|
| <i>trans</i> -[Ru(H <sub>2</sub> O)(NH <sub>3</sub> ) <sub>4</sub> (P(OEt) <sub>3</sub> ) <sup>2+</sup> ] (NIMAG = 0) |           |           |           |
| Atom                                                                                                                  | X         | Y         | Z         |
| Ru                                                                                                                    | -0.920229 | 0.677285  | -0.246905 |
| N                                                                                                                     | -0.755283 | 1.024370  | -2.350363 |
| H                                                                                                                     | -1.283127 | 1.846634  | -2.635635 |
| H                                                                                                                     | 0.227091  | 1.188148  | -2.569438 |
| H                                                                                                                     | -1.074214 | 0.242701  | -2.917450 |
| P                                                                                                                     | 1.156443  | -0.099756 | -0.163873 |
| N                                                                                                                     | -0.144871 | 2.636793  | 0.038069  |
| H                                                                                                                     | -0.887994 | 3.305507  | -0.154583 |
| H                                                                                                                     | 0.185469  | 2.795806  | 0.986818  |
| H                                                                                                                     | 0.634213  | 2.820414  | -0.591055 |
| N                                                                                                                     | -1.107000 | 0.445457  | 1.872116  |
| H                                                                                                                     | -1.501211 | 1.269460  | 2.321120  |
| H                                                                                                                     | -1.686657 | -0.349440 | 2.130359  |
| H                                                                                                                     | -0.170118 | 0.295591  | 2.249664  |
| N                                                                                                                     | -1.941097 | -1.170651 | -0.533516 |
| H                                                                                                                     | -2.927592 | -0.989983 | -0.353956 |
| H                                                                                                                     | -1.863341 | -1.538296 | -1.478435 |
| H                                                                                                                     | -1.630164 | -1.899040 | 0.104067  |
| O                                                                                                                     | -2.878588 | 1.574015  | -0.305811 |
| H                                                                                                                     | -3.372346 | 1.875995  | 0.470274  |
| O                                                                                                                     | 1.741265  | -1.683322 | -0.453697 |
| C                                                                                                                     | 1.568915  | -2.329589 | -1.758467 |
| H                                                                                                                     | 2.059448  | -1.724602 | -2.524822 |
| H                                                                                                                     | 0.503417  | -2.390830 | -1.991514 |
| C                                                                                                                     | 2.184265  | -3.704557 | -1.670797 |
| H                                                                                                                     | 1.693401  | -4.300356 | -0.900412 |
| H                                                                                                                     | 3.248342  | -3.638937 | -1.440463 |
| H                                                                                                                     | 2.070312  | -4.217764 | -2.628050 |
| O                                                                                                                     | 2.121036  | 0.830207  | -1.225823 |
| C                                                                                                                     | 3.561197  | 0.657566  | -1.459117 |
| H                                                                                                                     | 3.673922  | 0.505082  | -2.533012 |
| H                                                                                                                     | 3.908544  | -0.243715 | -0.948792 |
| C                                                                                                                     | 4.305773  | 1.890392  | -1.001726 |
| H                                                                                                                     | 4.188216  | 2.051262  | 0.071217  |
| H                                                                                                                     | 3.942567  | 2.775169  | -1.526329 |
| H                                                                                                                     | 5.370845  | 1.777342  | -1.216970 |
| O                                                                                                                     | 1.799008  | 0.061163  | 1.397031  |
| C                                                                                                                     | 3.055825  | -0.513632 | 1.896456  |
| H                                                                                                                     | 3.877841  | 0.122182  | 1.561908  |
| H                                                                                                                     | 3.178796  | -1.510958 | 1.475501  |
| C                                                                                                                     | 2.973586  | -0.545636 | 3.403343  |
| H                                                                                                                     | 2.152427  | -1.183177 | 3.734113  |
| H                                                                                                                     | 2.825533  | 0.456862  | 3.807163  |
| H                                                                                                                     | 3.905164  | -0.944974 | 3.810743  |
| H                                                                                                                     | -3.410647 | 1.667996  | -1.109453 |
| <i>trans</i> -[Ru(H <sub>2</sub> O)(NH <sub>3</sub> ) <sub>4</sub> (P(OEt) <sub>3</sub> )] <sup>+</sup> (NIMAG = 0)   |           |           |           |
| Atom                                                                                                                  | X         | Y         | Z         |
| Ru                                                                                                                    | -1.026143 | 0.661972  | -0.230223 |
| N                                                                                                                     | -0.749251 | 1.388261  | -2.233171 |
| H                                                                                                                     | -1.124023 | 2.323780  | -2.368630 |
| H                                                                                                                     | 0.268957  | 1.409629  | -2.337379 |
| H                                                                                                                     | -1.143668 | 0.785169  | -2.949703 |
| P                                                                                                                     | 0.984152  | -0.392316 | -0.336765 |
| N                                                                                                                     | 0.062902  | 2.349668  | 0.459766  |
| H                                                                                                                     | -0.539389 | 3.137830  | 0.681501  |
| H                                                                                                                     | 0.591259  | 2.070094  | 1.284515  |
| H                                                                                                                     | 0.739002  | 2.618890  | -0.252072 |
| N                                                                                                                     | -1.247062 | 0.064041  | 1.819002  |
| H                                                                                                                     | -1.700369 | 0.775042  | 2.387438  |

| ARTICLE |           |           | Journal Name |
|---------|-----------|-----------|--------------|
| H       | -1.749821 | -0.809616 | 1.947982     |
| H       | -0.279205 | -0.056992 | 2.130515     |
| N       | -2.299060 | -0.924645 | -0.909028    |
| H       | -3.238589 | -0.532921 | -0.930150    |
| H       | -2.056469 | -1.250232 | -1.840451    |
| H       | -2.292320 | -1.730122 | -0.289381    |
| O       | -3.021142 | 1.807754  | -0.097680    |
| H       | -3.513686 | 1.912249  | 0.731583     |
| O       | 2.391676  | -1.912376 | -0.479070    |
| C       | 2.238238  | -2.676563 | -1.690144    |
| H       | 2.894111  | -2.277266 | -2.477919    |
| H       | 1.206420  | -2.597548 | -2.068131    |
| C       | 2.570817  | -4.139375 | -1.444686    |
| H       | 1.901927  | -4.563358 | -0.692101    |
| H       | 3.598188  | -4.247439 | -1.089231    |
| H       | 2.465559  | -4.720606 | -2.365966    |
| O       | 1.905816  | 0.795676  | -1.305185    |
| C       | 3.302802  | 0.671444  | -1.696265    |
| H       | 3.331192  | 0.621553  | -2.788976    |
| H       | 3.699362  | -0.264494 | -1.297896    |
| C       | 4.089300  | 1.868044  | -1.199789    |
| H       | 4.075856  | 1.918560  | -0.109007    |
| H       | 3.673652  | 2.798297  | -1.592713    |
| H       | 5.130336  | 1.794546  | -1.526334    |
| O       | 1.562446  | -0.059968 | 1.306917     |
| C       | 2.832046  | -0.477337 | 1.880800     |
| H       | 3.652127  | -0.114528 | 1.256143     |
| H       | 2.881680  | -1.566280 | 1.894171     |
| C       | 2.918780  | 0.102138  | 3.276886     |
| H       | 2.096372  | -0.259417 | 3.897833     |
| H       | 2.878072  | 1.192919  | 3.250001     |
| H       | 3.859267  | -0.195232 | 3.747910     |
| H       | -3.263734 | 2.515257  | -0.715418    |

**Table S2.** Experimental (Exp) and calculated (Cal) geometric parameters of the complex *trans*-[RuCl(NO)(NH<sub>3</sub>)<sub>4</sub>]<sup>2+</sup>.

| Complex                                    | Exp   | Cal   | (Cal-Exp)/Exp   (%) |
|--------------------------------------------|-------|-------|---------------------|
| <b>Bond distances [Å]</b>                  |       |       |                     |
| Ru–NO                                      | 1.799 | 1.740 | 3.3                 |
| N–O <sup>[a]</sup>                         | 1.026 | 1.168 | 13.8                |
| Ru–Cl                                      | 2.376 | 2.384 | 0.3                 |
| Ru–NH <sub>3(cis)</sub> <sup>[b,c]</sup>   | 2.100 | 2.115 | 0.7                 |
| <b>Bond angles [°]</b>                     |       |       |                     |
| Ru–N–O                                     | 176.6 | 179.6 | 1.7                 |
| Cl–Ru–NO                                   | 177.9 | 179.7 | 1.0                 |
| NH <sub>3(cis)</sub> –Ru–NO <sup>[c]</sup> | 92.0  | 94.1  | 2.3                 |
| Cl–Ru–NH <sub>3(cis)</sub> <sup>[c]</sup>  | 88.1  | 85.9  | 2.5                 |

<sup>[a]</sup> Disorder problem observed in the experimental measure of this bond length (S. I. Gorelsky, S. C. da Silva, A. B. P. Lever and D. W. Franco, *Inorg. Chim. Acta*, 2000, **300**, 698–708); <sup>[b]</sup> Ru–NH<sub>3(cis)</sub> is the Ru–NH<sub>3</sub> chemical bond in *cis* position in relation to Ru–NO bond; <sup>[c]</sup> Average value.

**Table S3.** Ratio between kinetic energy density,  $G_b$ , and potential energy density,  $V_b$ ,  $-G_b/V_b$ , and electron density,  $\rho_b$ , at the selected BCPs of the transition states:  $[\text{RuCl}(\text{HNO})(\text{H}_2\text{O})(\text{NH}_3)_4]^{2+} + 8\text{H}_2\text{O}$ ,  $\text{trans}-[\text{RuCl}(\text{H}_2\text{O})(\text{NH}_3)_4]^{2+} + \text{HNO}\cdots\text{H}_2\text{O} + 7\text{H}_2\text{O}$ ,  $[\text{Ru}(\text{HNO})(\text{H}_2\text{O})_2(\text{NH}_3)_4]^{3+} + 8\text{H}_2\text{O}$  and  $[\text{Ru}(\text{H}_2\text{O})(\text{NO})(\text{NH}_3)_4(\text{P}(\text{OEt})_3)]^{2+} + 8\text{H}_2\text{O}$ . The values of all the parameters are in a.u.

| Complex                                                                                                                         | BCP                                            | $-G_b/V_b$ | $\rho_b$ |
|---------------------------------------------------------------------------------------------------------------------------------|------------------------------------------------|------------|----------|
| $[\text{RuCl}(\text{HNO})(\text{H}_2\text{O})(\text{NH}_3)_4]^{2+} + 8\text{H}_2\text{O}$                                       | $\text{OHN}\cdots\text{Ru}$                    | 0.874      | 0.058    |
|                                                                                                                                 | $\text{HNO}\cdots\text{H}-\text{NH}_2$         | 1.242      | 0.018    |
|                                                                                                                                 | $\text{OHN}\cdots\text{OH}_2$                  | 0.994      | 0.045    |
|                                                                                                                                 | $\text{ONH}\cdots\text{OH}_2$                  | 0.865      | 0.045    |
| $\text{trans}-[\text{RuCl}(\text{H}_2\text{O})(\text{NH}_3)_4]^{2+} + \text{HNO}\cdots\text{H}_2\text{O} + 7\text{H}_2\text{O}$ | $\text{OHN}\cdots\text{Ru}$                    | 0.856      | 0.037    |
|                                                                                                                                 | $\text{OHN}\cdots\text{Cl}^-$                  | 1.049      | 0.024    |
|                                                                                                                                 | $\text{OHN}\cdots\text{OH}_2$                  | 1.348      | 0.006    |
|                                                                                                                                 | $\text{HNO}\cdots\text{OH}_2$                  | 1.525      | 0.003    |
| $[\text{Ru}(\text{HNO})(\text{H}_2\text{O})_2(\text{NH}_3)_4]^{3+} + 8\text{H}_2\text{O}$                                       | $\text{OHN}\cdots\text{Ru}$                    | 0.873      | 0.057    |
|                                                                                                                                 | $\text{OHN}\cdots\text{OH}_2$                  | 0.992      | 0.046    |
|                                                                                                                                 | $\text{HNO}\cdots\text{H}-\text{NH}_2$         | 1.223      | 0.019    |
|                                                                                                                                 | $\text{ONH}\cdots\text{OH}_2$                  | 0.896      | 0.041    |
| $[\text{Ru}(\text{H}_2\text{O})(\text{NO})(\text{NH}_3)_4(\text{P}(\text{OEt})_3)]^{2+} + 8\text{H}_2\text{O}$                  | $\text{Ru}-\text{NO}$                          | 0.840      | 0.056    |
|                                                                                                                                 | $\text{Ru}-\text{O}_2\text{H}$                 | 0.970      | 0.024    |
|                                                                                                                                 | $\text{NH}_2-\text{H}\cdots\text{NO}$          | 1.147      | 0.025    |
|                                                                                                                                 | $\text{NO}\cdots\text{H}-\text{NH}_2$          | 1.279      | 0.016    |
|                                                                                                                                 | $\text{HO}-\text{H}\cdots\text{OH}_2$          | 0.864      | 0.043    |
|                                                                                                                                 |                                                | 0.827      | 0.049    |
|                                                                                                                                 | $\text{H}_2\text{O}\cdots\text{H}-\text{NH}_2$ | 1.014      | 0.034    |
|                                                                                                                                 | $\text{H}_2\text{O}\cdots\text{NO}$            | 1.117      | 0.017    |
